**Title:** Black-box testing in motor sequence learning

**Authors:** Pablo Maceira-Elvira<sup>1,2,Ω</sup>, Jan E. Timmermann<sup>4,Ω</sup>, Traian Popa<sup>1,2,λ</sup>, Anne-Christine Schmid<sup>1,2,λ</sup>, John W. Krakauer<sup>5</sup>, Takuya Morishita<sup>1,2</sup>, Maximilian J. Wessel<sup>1,2</sup>, Friedhelm C. Hummel<sup>1,2,3\*</sup>

Ω contributed equally, λ contributed equally

<sup>1</sup> Defitech Chair of Clinical Neuroengineering, Center for Neuroprosthetics and Brain Mind Institute, EPFL Valais, Clinique Romande de Réadaptation Sion, Switzerland.

<sup>2</sup> Defitech Chair of Clinical Neuroengineering, Center for Neuroprosthetics and Brain Mind Institute, EPFL, Geneva, Switzerland.

<sup>3</sup> Clinical Neuroscience, University of Geneva Medical School, Geneva, Switzerland.

<sup>4</sup> University Medical Center Hamburg-Eppendorf, Hamburg, Germany.

<sup>5</sup> The Johns Hopkins University School of Medicine, Baltimore, MD 21287, USA.

**\*Correspondence:**

Friedhelm Hummel, Defitech Chair of Clinical Neuroengineering, Center for Neuroprosthetics (CNP), Swiss Federal Institute of Technology (EPFL), Campus Biotech, Room H4.3.132.084, Chemin des Mines 9, 1202 Geneva, Switzerland,  
Email: [friedhelm.hummel@epfl.ch](mailto:friedhelm.hummel@epfl.ch)

## 2 **Abstract**

3 During learning of novel motor sequences, practice leads to the consolidation of  
4 hierarchical structures, namely motor chunks, facilitating the accurate execution of  
5 sequences at increasing speeds. Recent studies show that such hierarchical structures  
6 are largely represented upstream of the primary motor cortex in the motor network,  
7 suggesting their function to be more related to the encoding, storage, and retrieval of  
8 sequences rather than their sole execution. We isolated different components of motor  
9 skill acquisition related to the consolidation of spatiotemporal features and followed  
10 their evolution over training. We found that optimal motor skill acquisition relies on the  
11 storage of the spatial features of the sequence in memory, followed by the optimization  
12 of its execution and increased execution speeds (i.e., a shift in the speed-accuracy  
13 trade-off) early in training, supporting the model proposed by Hikosaka in 1999.  
14 Contrasting the dynamics of these components during ageing, we identified less-than-  
15 optimal mechanisms in older adults explaining the observed differences in  
16 performance. We applied noninvasive brain stimulation in an attempt to support the  
17 aging brain to compensate for these deficits. The present study found that anodal direct  
18 current stimulation applied over the motor cortex restored the mechanisms involved in  
19 the consolidation of spatial features, without directly affecting the speed of execution  
20 of the sequence. This led older adults to sharply improve their accuracy, resulting in  
21 an earlier yet gradual emergence of motor chunks. The results suggest the early  
22 storage of the sequence in memory, largely independent of motor practice, is crucial  
23 for an optimal motor acquisition and retrieval of this motor behavior. Nevertheless, the  
24 consolidation of optimal temporal patterns, detected as motor chunks at a behavioral  
25 level, is not a direct consequence of storing the sequence elements, but rather of motor  
26 practice.

## 27 **Introduction**

28 Completing daily life activities often requires the sequential execution of actions in a  
29 specific order. A large amount of research has focused on how humans acquire  
30 sequential motor skills using well established experimental paradigms alongside  
31 different imaging techniques to study the processes that lead to skill improvement <sup>1</sup>.  
32 One of these paradigms, known as the sequential finger-tapping task <sup>2,3</sup>, has been  
33 used in past years due to its similarity to certain activities requiring higher dexterous  
34 skill, such as piano playing or typing on a computer. Performance improvement of a  
35 sequence-tapping task is characterized by a shift in the speed-accuracy tradeoff, in  
36 which the speed of execution of the motor sequence increases without sacrificing the  
37 accuracy <sup>4</sup>. The execution of sequential elements at increasing speeds leads to the  
38 spontaneous emergence of execution patterns <sup>5,6</sup>, namely motor chunks <sup>7</sup>, which  
39 reduce mental load <sup>8</sup> and facilitate a further increase in speed without sacrificing  
40 accuracy <sup>9</sup>.

41 Recent discussions about this type of motor task are concerned with its validity for  
42 probing changes in motor ability <sup>10</sup>. Motor chunks seem to be crucial for the  
43 optimization of such a task. In spite of the ongoing debate on the role of the primary  
44 motor cortex (M1) in motor skill acquisition <sup>11,12</sup>, recent studies have not found a  
45 representation of such structures in the primary motor cortex <sup>13,14</sup>, so it would appear  
46 the task is probing mainly the cognitive aspects of motor learning, specifically the  
47 efficient retrieval of the sequence elements from memory (for a detailed discussion,  
48 please see <sup>15</sup>). Nevertheless, most studies looking at the consolidation of motor  
49 chunks have been done in healthy young adults, a population in which the involved  
50 mechanisms, such as the encoding, storage and the successful retrieval of sequence  
51 elements may be acting too quickly to be captured by the applied methods.

52 Black-box testing ([https://en.wikipedia.org/wiki/Black-box\\_testing](https://en.wikipedia.org/wiki/Black-box_testing)), a common  
53 software testing technique, examines the functionality of an application by comparing  
54 the expected functionality of the system (i.e., requirement) and its actual  
55 performance. This approach can be applied to biological systems as well. For  
56 example, Shadmehr and Krakauer<sup>16</sup> compared computational models describing  
57 motor control to specific populations of patients with lesions in the central nervous  
58 system, mapping different model parameters to lesioned brain areas and attributing  
59 distinct roles to them (e.g., state estimation, optimization, etc.). Similarly,  
60 understanding the mechanisms involved in motor sequence learning may be better  
61 achieved through the juxtaposition of individuals constituting the requirement (e.g.,  
62 young adults, depicting optimal performance) and individuals in which the involved  
63 mechanisms may no longer function optimally (e.g., older adults).

64 Previous research shows neurophysiological, structural and functional changes  
65 occurring in the aging brain that lead to a decline in cognitive<sup>17</sup> and motor functions  
66<sup>18–22</sup>; for review, please refer to<sup>23,24</sup>. As such, motor skill acquisition is typically  
67 diminished in older adults<sup>3,25,26</sup>. However, the application of anodal transcranial  
68 direct current stimulation (atDCS) to the motor cortex seems to enhance the motor  
69 skill acquisition<sup>3,27</sup>. Even though the mechanisms of action of atDCS in individuals  
70 are complex and not yet entirely understood, its application can be used as an  
71 additional probe in the “black-box testing” of motor skill acquisition.

72 We designed a study intended to identify (a) the main factors leading to differences in  
73 motor skill acquisition with aging, and (b) the effect of applying noninvasive brain  
74 stimulation during motor training. Comparing different components of motor skill  
75 acquisition in young and older adults, constituting the extremes of performance in this  
76 study, we found that the improvement of the sequence-tapping task is maximized by

77 the early consolidation of the spatial properties of the sequence in memory (i.e.,  
78 sequence order), leading to a reduced error of execution, and by the optimization of  
79 its temporal features (i.e., chunking). We found the consolidation of spatiotemporal  
80 features to occur early in training in young adults, suggesting the emergence of  
81 motor chunks to be a direct consequence of committing the sequence elements to  
82 memory. This process, seemingly less efficient in older adults, could be partially  
83 restored using atDCS by enabling the early consolidation of spatial features, allowing  
84 them to prioritize the increase of their speed of execution, ultimately leading to an  
85 earlier consolidation of motor chunks. This separate consolidation of spatial and  
86 temporal features seen in older adults suggests that the emergence of temporal  
87 patterns, commonly identified as motor chunks at a behavioral level, stem from the  
88 optimization of the execution of the motor sequence resulting from practice, which  
89 can occur only after the sequence order has been stored in memory.

90

## 91 **Results**

92 **Age-related behavioral differences in the execution and practice of a sequence-**  
93 **tapping task.** We studied differences in motor performance related to healthy aging  
94 using a well-established sequence-tapping task<sup>2,3</sup>, and followed their evolution  
95 during training. We recruited a cohort of 52 healthy adults belonging to three age  
96 groups: young (18-30 y/o; n = 22, 13 female; age $\mu$  = 24.7 y/o), middle-aged (50-65  
97 y/o; n = 15, 9 female; age $\mu$  = 57.4 y/o), and older (>65 y/o; n = 15, 8 female; age $\mu$  =  
98 74.1 y/o). Each participant trained for twenty minutes each day on five consecutive  
99 days. The training consisted of six 90-second training blocks interspaced by 90-  
100 second blocks of rest. The participants had to replicate a nine-digit sequence  
101 displayed on a screen, as quickly and as accurately as possible, using their left

102 (nondominant) hand. We inserted a seventh block with a different sequence (*i.e.*,  
103 “catch” block) halfway through training to evaluate the difference between the pure  
104 motor execution of a random sequence and that of the trained sequence. The  
105 participants returned on day 10 and day 60, from the beginning of training, to  
106 evaluate the long-term retention of the learned sequence.

107 *Figure 1a* shows the main results of this experiment. We found no transfer of learning  
108 from the training sequence to the catch blocks, so we removed these blocks for the  
109 subsequent analyses (please refer to *Supplementary Materials* to find the scores  
110 including the catch blocks). We scored participants by considering the number of  
111 correct sequences produced in each block, weighted by the ratio of correct to  
112 absolute number of sequences (*i.e.*, percent correct). To capture individual  
113 improvement on the training sequence, we corrected individual scores by subtracting  
114 the score in the first block from the scores in the following blocks as a normalization  
115 procedure (please refer to *Supplementary Materials* for more information on the  
116 choice for scoring, as well as to find the uncentered scores of all groups).

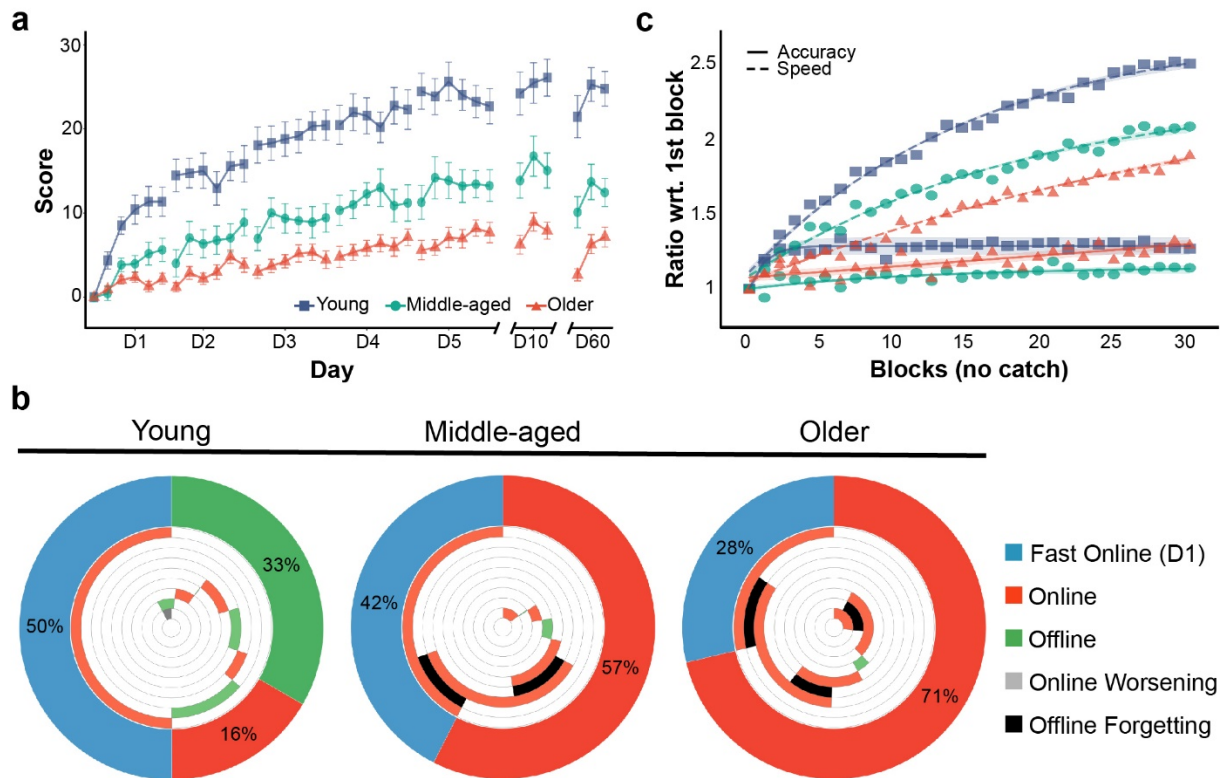

118 **Figure 1. Motor skill acquisition in Experiment 1.** **a)** Scores generated during Experiment 1, in which participants trained on  
 119 the motor sequence with no stimulation. Scores are averaged per age group, and the error bars correspond to the standard  
 120 error of the mean. The blocks of “catch trials” with a different sequence (one block every training day) are not presented. **b)**  
 121 Percentage of total learning over the entire training week represented by different aspects of learning (i.e., fast-online learning  
 122 during D1, online learning during D2-5, and offline learning between training days). The outer ring captures the proportion of  
 123 total learning by these three aspects, while the inner rings present their time course during the week (anticlockwise): 1<sup>st</sup> inner  
 124 circle is the online performance gain during D1, 2<sup>nd</sup> inner circle is the offline performance gain between D1 and D2, 3<sup>rd</sup> inner  
 125 circle is the online gain during D2, etc. Orange and green represent improvements, while black and gray represent worsening  
 126 of performance. Please note that young adults show offline improvement between days, while middle-aged and older adults  
 127 not only lack such improvement but also worsen overnight. **c)** Speed and accuracy, normalized to the values in the first block  
 128 of training, reflect relative changes with respect to initial levels. All groups show consistent increases in speed with similar  
 129 dynamics; relative differences in magnitude between age groups show young adults being fastest and older adults slowest.  
 130 Please note the different accuracy dynamics when comparing young adults, who sharply improve accuracy on the first day, to  
 131 older adults, who gradually improve accuracy during the entire training week. Of particular import is the fact of all age groups  
 132 displaying consistently increasing speeds, without ever dropping in accuracy, constituting a shift in the speed-accuracy  
 133 tradeoff. The shading represents the 95% confidence interval for the logarithmic curve fitting (this type of curve is for display  
 134 purposes only and not included in the LME analysis).

135 We used a linear mixed-effects (LME, please refer to *Methods* for details) model to  
136 quantify differences between groups. Scores on the fifth day (*i.e.*, total learning,  
137 relative to the first block of training) were significantly higher in the young adults than  
138 in the middle-aged ( $T_{[55]} = 10.78$ ,  $d = 2.61$ ,  $p < 0.0001$ ) and older ( $T_{[55]} = 17.08$ ,  $d =$   
139  $4.14$ ,  $p < 0.0001$ ) adults, with the middle-aged group scoring significantly higher than  
140 the older group ( $T_{[55]} = 6.3$ ,  $d = 1.52$ ,  $p = 0.01$ ). At the follow-up testing days (*i.e.*, day  
141 10 and day 60), the relative differences between the age groups persisted.  
142 Performance in all groups continued to increase significantly by the tenth day ( $T_{[414]} =$   
143  $1.39$ ,  $d = 0.31$ ,  $p = 0.01$ ), but dropped back to the level of day five on day 60.

144 The performance of individuals executing explicit motor sequence learning tasks has  
145 been characterized by nonlinear improvement dynamics, showing sharp  
146 improvements occurring during the first training day and modest improvements in  
147 subsequent days<sup>28</sup>. Therefore, we compared the rate of improvement (*i.e.*, slopes)  
148 between age groups on each training day. We found a marked difference on the first  
149 day, where the slope for the young group was significantly steeper than the slope for  
150 the middle-aged ( $T_{[245]} = 0.88$ ,  $d = 0.99$ ,  $p = 0.008$ ) and older ( $T_{[245]} = 1.59$ ,  $d = 1.8$ ,  $p$   
151  $< 0.0001$ ) groups. In young individuals, this slope was significantly steeper than that  
152 on the second day ( $T_{[245]} = 1.72$ ,  $d = 1.94$ ,  $p < 0.0001$ ). Differences between slopes in  
153 middle-aged and older groups on the first day and differences among all groups from  
154 the second day onward were not significant. This suggested that the dynamics of the  
155 learning process, especially on the first day, are one of the main factors leading to  
156 the differences observed by the end of training.

157 We also tested overnight consolidation (*i.e.*, offline learning), which is known to be  
158 diminished in aging populations<sup>29,30</sup> due to different sleep patterns, such as lower



159 quality or fragmented sleep<sup>31</sup>. We found offline learning to be significantly higher in  
160 the young adults than in the middle-aged ( $T_{[196]} = 2.53$ ,  $d = 0.55$ ,  $p = 0.002$ ) and older  
161 ( $T_{[196]} = 2.63$ ,  $d = 0.57$ ,  $p = 0.001$ ) adults, with no differences found between the  
162 middle-aged and older groups ( $T_{[196]} = 0.1$ ,  $d = 0.02$ ,  $p = 0.99$ ).

163 *Figure 1b* shows the proportion of total learning represented by fast online learning  
164 during the first day, slower online learning during the subsequent days, and offline  
165 learning between training days. Of note was the lack of offline learning in the middle-  
166 aged and older adults, which was replaced by offline forgetting. Previous research  
167 has shown learning consolidation after sleep for finger-tapping tasks<sup>2,32</sup>, an effect  
168 apparent here in young participants. The extent of this consolidation might depend on  
169 different sleep-related factors<sup>33</sup>. In older adults, previous research has shown  
170 impaired consolidation of motor learning<sup>29,30</sup>, potentially related to reduced sleep  
171 spindle oscillations and an associated decrease in activity in the corticostriatal  
172 network<sup>34</sup>. Diminished sleep quality in older adults, derived from changes in the  
173 circadian rhythm and fragmented sleep<sup>31</sup>, could also contribute to the lack of offline  
174 gains.

175 **Age-dependent differences in speed and accuracy.** As motor skill acquisition  
176 refers to the practice-related increase in speed and accuracy in the execution of a  
177 motor task<sup>35</sup>, these parameters could explain differences in the slope on the first  
178 day. Speed in the young adults was significantly higher than that in the middle-aged  
179 ( $T_{[49]} = 7.4$ ,  $d = 2.64$ ,  $p = 0.0002$ ) and older ( $T_{[49]} = 12.33$ ,  $d = 4.40$ ,  $p < 0.0001$ )  
180 adults, and speed in the middle-aged adults was higher than that in the older adults  
181 ( $T_{[49]} = 4.93$ ,  $d = 1.76$ ,  $p = 0.02$ ). Accuracy on the first day was not significantly  
182 different between age groups, but the young group was significantly more accurate

183 than the older group on day two ( $T_{[76]} = 0.07$ ,  $d = 0.82$ ,  $p = 0.01$ ) and day three ( $T_{[76]}$   
184  $= 0.07$ ,  $d = 0.81$ ,  $p = 0.01$ ).

185 We normalized the speed and accuracy in each group to study the dynamics of these  
186 two parameters. *Figure 1c* shows the changes in both speed and accuracy relative to  
187 the first block of training for all three groups (please refer to *Supplementary Materials*  
188 for more details on the calculation of speed and accuracy). Speed consistently  
189 increased across training in all age groups, albeit to different extents (*Figure 1c*,  
190 dashed lines). Accuracy in the young and older adults followed different dynamics;  
191 starting from similar levels of accuracy on the first day, the young participants sharply  
192 increased their accuracy in the early stages of training and reached a plateau,  
193 whereas the older group gradually reached its maximum accuracy over the course of  
194 the training week (*Figure 1c*, solid lines). In other words, young adults improved their  
195 execution following a pattern reminiscent of the model presented by Hikosaka and  
196 colleagues<sup>36</sup>, in which the spatial coordinates of the task (i.e., the accurate mapping  
197 of numbers to fingers stored in memory) are optimized before the motor coordinates  
198 (i.e., rapid execution of motion). In contrast, older adults seem to develop both  
199 coordinates in parallel, gradually increasing both speed and accuracy.

200 **Motor chunks and age-related differences.** Motor chunking is a well-established  
201 model of how individuals approach sequential tasks<sup>6</sup>. In the hierarchical model of  
202 sequencing, long sequences are segmented into shorter chunks<sup>37</sup>, which consist of  
203 groups of individual movements prepared and buffered for their rapid successive  
204 execution, to balance execution efficiency and computational complexity<sup>38</sup>. We  
205 extracted chunking patterns from every participant by applying a cluster-based  
206 algorithm (please refer to *Methods* for details) that characterized their strategies for

207 each day with a binary, nine-digit sequence. *Figure 2* depicts a radial visualization of  
208 the patterns extracted for each participant on day one.

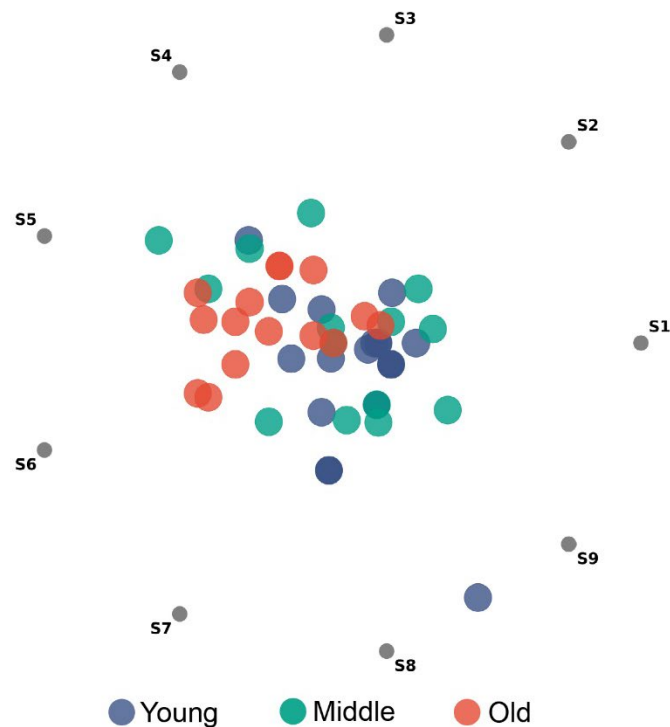

210 *Figure 2. Radial visualization of chunking patterns generated during the first day of training by participants in the first*  
211 *experiment that involved motor training without stimulation. Gray dots on the perimeter of the circle (S1, S2, ..., S9)*  
212 *correspond to each bin of the chunking pattern extracted from each participant. Each value of the chunking patterns acts as*  
213 *a “rope” pulling on the data points. For example, a chunking strategy grouping almost exclusively the last three elements of*  
214 *the sequence (labeled [0, 0, 0, 0, 0, 0, 1, 1]) would cause bits S8 and S9 to pull on the data point, resulting in the blue dot*  
215 *situated between S8 and S9 on the plot.*

216 The young and older adults clustered more densely in specific regions, whereas  
217 middle-aged adults were distributed between the other two. To quantify the  
218 differences in chunking strategies between age groups, we fitted a support vector  
219 classifier (SVC) to patterns generated by young and older adults on the first day  
220 (please refer to *Methods* for more details), as they represented the extremes in  
221 speed and general performance. After fine-tuning the classifier, we extracted the  
222 distance of each nine-dimensional data point characterizing the chunking patterns to

223 the decision boundary separating the “young” and “old” classes; we hereafter refer to  
224 this parameter as the “chunking distance”. *Figure 3a* shows the extracted chunking  
225 distances for the first and last days of training, as well as for day 60 post-training (i.e.,  
226 the last follow-up session). On the first day, patterns from most young and older  
227 participants were correctly classified as such, confirming the presence of the clusters  
228 we detected by visual inspection in *Figure 2*. Regarding the middle-aged adults, most  
229 seemed to generate patterns that were more similar to those of the young adults on  
230 the first day, with some exceptions.

231

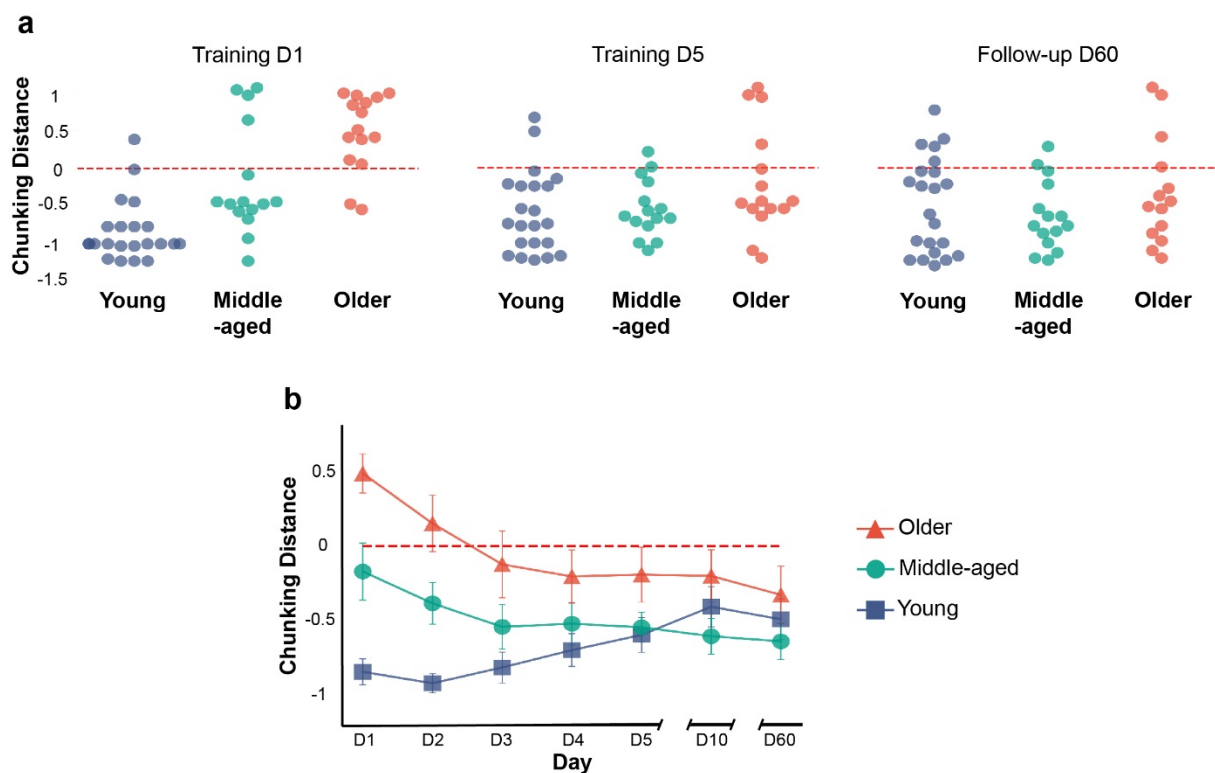

233 *Figure 3. Evolution of chunking patterns during motor skill acquisition in Experiment 1. a)* Chunking distance for patterns  
234 generated on the first and last days of training, as well as on the last follow-up session (i.e., day 60), for each group in  
235 Experiment 1. *b)* Average chunking distance for each group on each day, with its corresponding standard error. The red dashed  
236 line in both panels indicates the boundary between the two classes that characterizes the chunking strategies of the young  
237 and older participants during the first training day, with any distance larger than zero being labeled “old” and any distance  
238 smaller than zero labeled “young”.

239 We used the same model to separate chunking patterns for the remaining days,  
240 which consisted of data points previously unseen by the classifier. *Figure 3a* shows  
241 that most middle-aged and older adults generated chunking patterns similar to those  
242 of the young adults by the end of training, with young adults not significantly  
243 changing their strategies. This is consistent with reports from the literature showing  
244 “young-like” chunking in older adults after more prolonged training<sup>39</sup>. *Figure 3b*  
245 shows that this process was more gradual in older adults, which was consistent with  
246 the gradual increases in accuracy shown in *Figure 1c*.

247 **Motor training in combination with atDCS in an aging population.** We conducted  
248 a separate experiment (Experiment 2) following the same design as in Experiment 1,  
249 with the addition of atDCS applied over the motor cortex contralateral to the training  
250 hand during motor skill acquisition to enhance performance of the task. We recruited  
251 a new cohort of 61 healthy adults belonging to the same age groups: young (18-30  
252 y/o; n = 19, 15 female; age $\mu$  = 24.4), middle-aged (50-65 y/o; n = 19, 11 female; age $\mu$   
253 = 58), and older (>65 y/o; n = 23, 13 female; age $\mu$  = 71.2) groups. We randomly  
254 assigned participants in each age group to receive either real (*i.e.*, verum; young =  
255 10, middle-aged = 9, older = 14) or placebo stimulation (young = 9, middle-aged =  
256 10, older = 9). The participants trained for the same amount of time as the  
257 unstimulated cohort (*i.e.*, 20 min/day for five days) and returned twice to test the  
258 long-term effects of learning and stimulation. We placed the anode electrode over the  
259 right motor cortex (M1), centered over the representation of the first dorsal  
260 interosseous (FDI) muscle of the left hand on the motor cortex, identified using  
261 single-pulse TMS.

262 *Figure 4a* shows the main results of this experiment. We tested the placebo groups in  
263 the same way as we did the unstimulated cohort in the first experiment and found  
264 similar relative differences between age groups. All statistical tests for both  
265 experiments are detailed in the *Supplementary Materials*. The first row of *Figure 4b*  
266 shows the same lack of offline learning in middle-aged and older participants that  
267 was replaced by offline worsening, as seen in Experiment 1 (*Figure 1b*).

268 After verifying the findings from the first cohort, we tested the effects of verum and  
269 placebo stimulation in each separate age group. Total learning was not significantly  
270 different in the young ( $T_{[20]} = 2.68$ ,  $d = 0.53$ ,  $p = 0.37$ ) or middle-aged ( $T_{[20]} = 1.58$ ,  $d$   
271  $= 0.44$ ,  $p = 0.44$ ) groups. In the older group, however, we found higher total learning  
272 in the verum group ( $T_{[24]} = 4.56$ ,  $d = 1.53$ ,  $p = 0.01$ ) with respect to placebo. In the  
273 follow-up sessions, we found no significant differences in scores between the verum  
274 and placebo stimulation in young and middle-aged participants. Performance on day  
275 60 did not change in the young group with respect to day 5, but dropped significantly  
276 in the middle-aged ( $T_{[150]} = 2.41$ ,  $d = 0.61$ ,  $p = 0.003$ ) and older groups ( $T_{[150]} = 1.4$ ,  $d$   
277  $= 0.43$ ,  $p = 0.02$ ). However, the older group undergoing verum stimulation continued  
278 to score significantly higher than the group undergoing placebo stimulation ( $T_{[21]} =$   
279  $4.92$ ,  $d = 1.49$ ,  $p = 0.02$ ). After reconsolidation on day 60 (*i.e.*, after the first block),  
280 scores were not significantly different from scores on day 5, providing no evidence for  
281 skill loss, but a maintenance of the acquired skill even two months after training.

282 We did not find a significant effect of stimulation in either online or offline learning  
283 when testing all training days. When testing fast online learning as a separate  
284 component of learning<sup>28</sup>, we identified a steeper improvement rate in the older group  
285 receiving verum stimulation relative to placebo ( $T_{[21]} = 3.5$ ,  $d = 1.15$ ,  $p = 0.01$ ). We

286 illustrate this difference (and lack thereof in the other groups) in the second row of  
287 *Figure 4b*, showing the proportion of the different components of learning to total  
288 learning in the verum group (outer rings). These proportions were similar to those in  
289 the placebo group for both young and middle-aged adults. In the older group, the  
290 proportion of fast online learning to total learning was much larger than that in the  
291 placebo group.

292 *Figure 4c* shows the dynamics of speed and accuracy in the second experiment.  
293 There were no significant differences in speed between the verum and placebo  
294 groups in any of the three age groups. In terms of accuracy, the young group  
295 receiving verum stimulation was significantly less accurate than the placebo group by  
296 the end of training ( $T_{[23]} = 0.07$ ,  $d = 0.97$ ,  $p = 0.04$ ). The middle-aged group receiving  
297 verum stimulation was significantly less accurate than the placebo group on the first  
298 ( $T_{[21]} = 0.14$ ,  $d = 1.67$ ,  $p = 0.002$ ) and second ( $T_{[21]} = 0.1$ ,  $d = 1.21$ ,  $p = 0.02$ ) days. In  
299 the older group, the verum group was consistently and significantly more accurate  
300 than the placebo group on all days, except the third (please refer to *Supplementary*  
301 *Materials* to find the results of the comparisons), even though we did not find a  
302 significant difference in accuracy on the first block ( $F_{[1]} = 0.38$ ,  $p = 0.84$ ). As in the  
303 first experiment, the older group receiving placebo stimulation reached its maximum  
304 accuracy gradually over the course of the week. In contrast, the older group receiving  
305 verum stimulation displayed a sharp increase on the first day and quickly reached its  
306 plateau, with dynamics reminiscent of those observed in the young group in the first  
307 experiment (please see *Figure 1c*, solid lines). In summary, verum atDCS led older  
308 participants to score higher by the end of training. Yet, it appears not to have had any  
309 effect on the speed of execution of the task; our results suggest that verum atDCS

310 led older adults to improve their accuracy quickly on the first day, much like young  
 311 adults did in the first experiment.

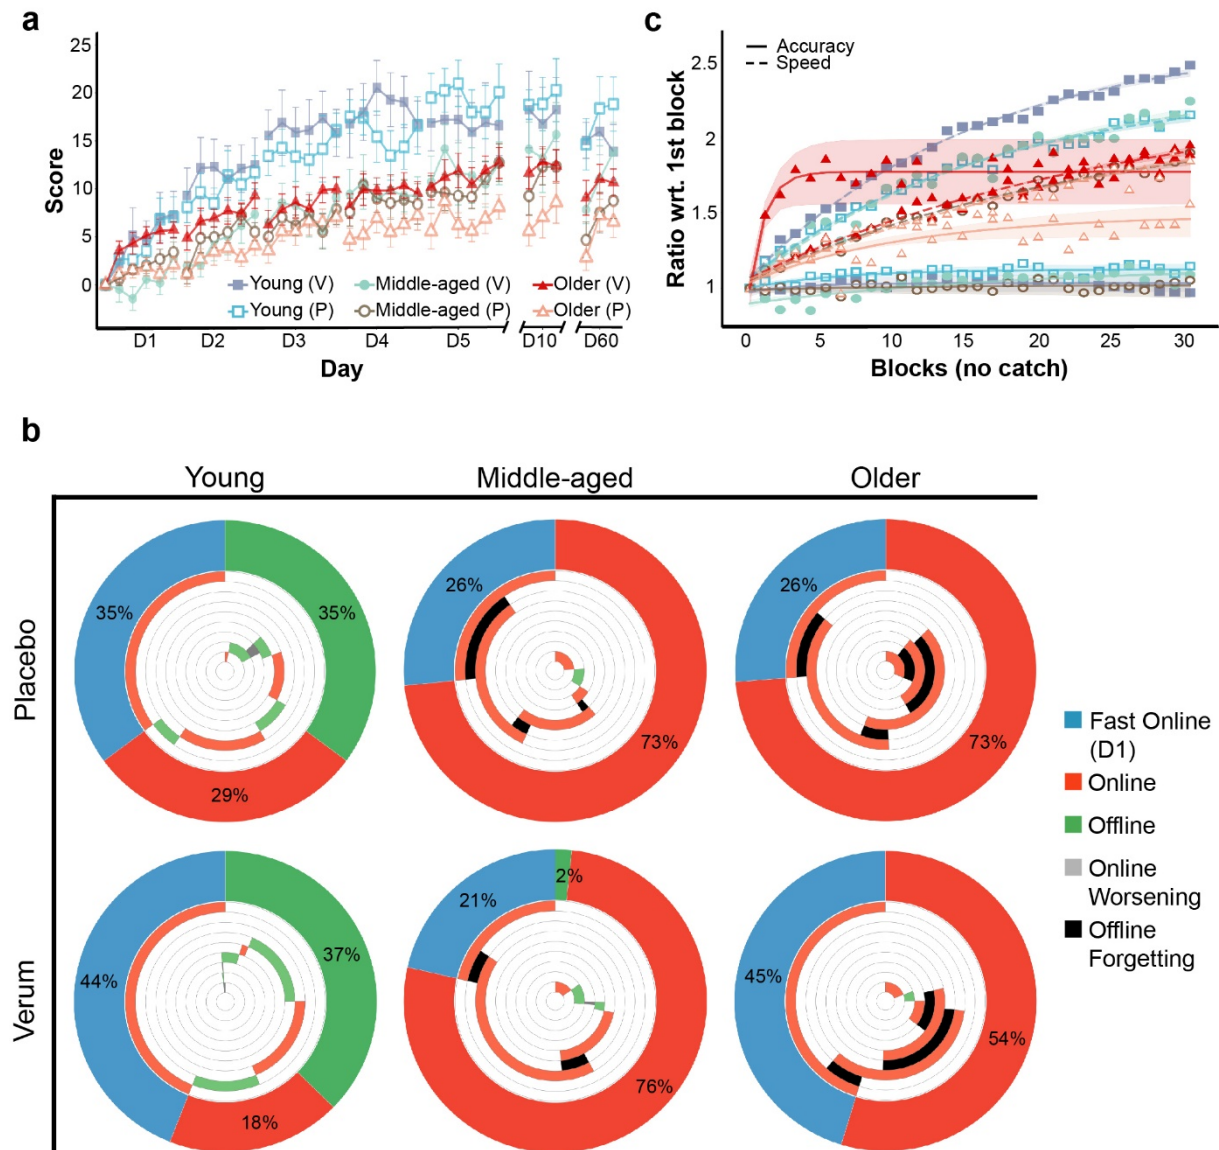

313 **Figure 4. Motor skill acquisition in Experiment 2.** **a)** Average scores generated during Experiment 2, consisting of motor  
 314 training with stimulation, with the error bars depicting the standard error of the mean. The data are grouped by age group  
 315 and stimulation type (i.e., verum (V) or placebo (P)). **b)** Percentage of total learning over the entire training week represented  
 316 by fast online learning (D1), online learning during D2-5, and offline learning between training days. Each outer ring captures  
 317 the proportion of total learning by these three aspects, while the inner rings present their time course during the week  
 318 (anticlockwise): 1<sup>st</sup> inner circle is the online performance gain during D1, 2<sup>nd</sup> inner circle is the offline performance gain  
 319 between D1 and D2, 3<sup>rd</sup> inner circle is the online gain during D2, etc. Orange and green represent improvements, while black  
 320 and gray represent worsening of performance. Please note the large difference in regard to the proportion of total learning



321 *explained by fast online learning between the verum and placebo groups in older participants. c) Speed and accuracy*  
322 *normalized to the first block of training, grouped by age group and stimulation type (i.e., verum (V) or placebo (P)). Please*  
323 *note that while most groups show similar dynamics to those seen in the respective age-matched groups from the first*  
324 *experiment, the older group receiving verum stimulation shows dynamics more similar to those seen in young adults. As in the*  
325 *first experiment, the accuracy was maintained even at increasing speeds, although young adults receiving verum stimulation*  
326 *significantly dropped in accuracy on the last training day. The shading represents the 95% confidence interval for the*  
327 *logarithmic curve fitting (the type of curve is for display purposes only and not included in the LME analysis).*

328 **Chunking and stimulation.** In the first part of the analysis, we proposed that  
329 differences in accuracy could derive, at least in part, from differences in the  
330 consolidation and deployment of motor chunks during training between age groups.  
331 We applied the same classifier trained with data from the unstimulated cohort to the  
332 chunking patterns extracted from participants receiving verum and placebo  
333 stimulation (data were not seen before by the SVC). *Figure 5a* shows that on the first  
334 day of training, the model classified most young participants correctly, while it  
335 classified most middle-aged participants as young; this matched the results obtained  
336 from the unstimulated cohort. The model also correctly classified older participants  
337 receiving placebo stimulation. In contrast, the model classified almost half of the  
338 older participants receiving verum stimulation as young. By the end of training, most  
339 participants executed chunking patterns more similar to those of the young, matching  
340 our previous findings. *Figure 5b* shows the gradual evolution of chunking patterns in  
341 all groups, with young adults executing patterns in a consistent manner. Middle-aged  
342 adults start with patterns more similar to those of young adults, which become even  
343 more similar over the course of the training week. Older adults drift from “old-like”  
344 patterns to “young-like” patterns, as seen in the first experiment, with this transition  
345 occurring sooner in the verum group.

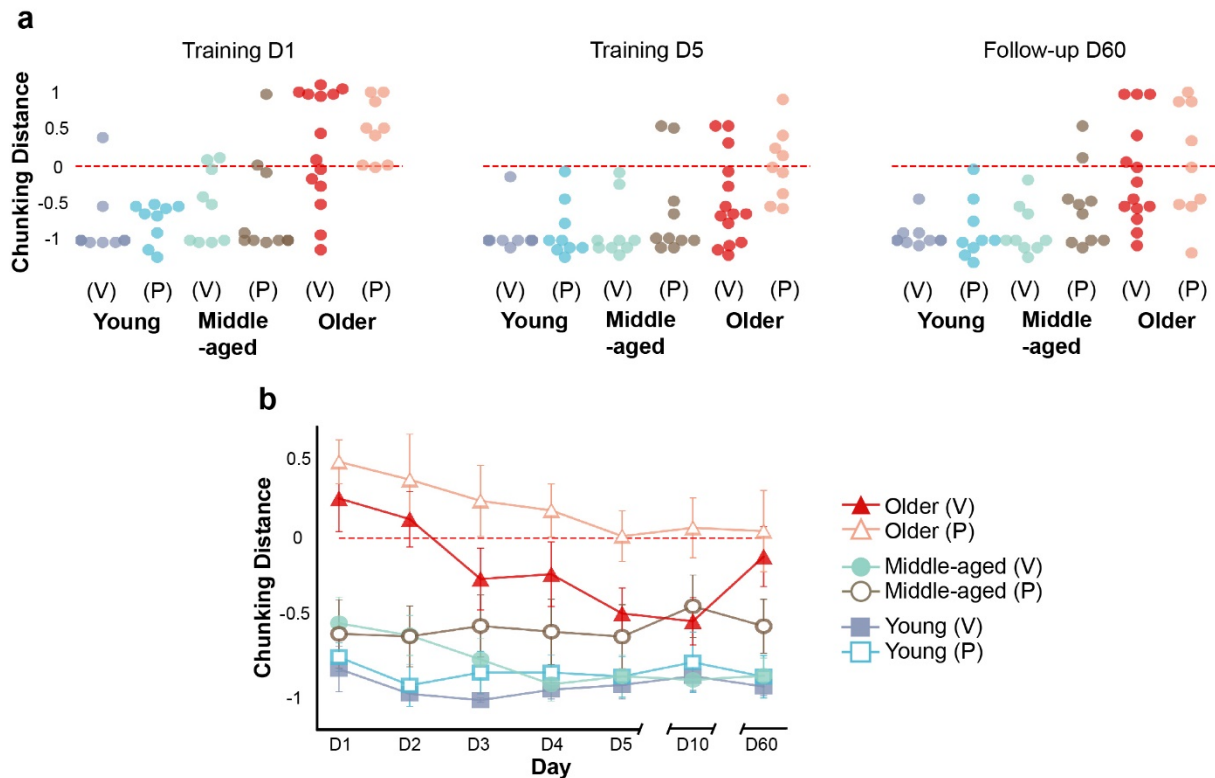

347 **Figure 5. Evolution of chunking patterns during motor skill acquisition in Experiment 2. a)** Chunking distance for patterns  
 348 generated on the first and last days of training, as well as on the last follow-up session (i.e., day 60), for each group receiving  
 349 either verum (V) or placebo (P) stimulation. As described in Figure 3, the red dashed line indicates the boundary between the  
 350 old (distance > 0) and young (distance < 0) classes. Please note that all groups present a similar set of distances as in the first  
 351 experiment (Figure 3a), with the exception of the older group receiving verum stimulation, in which half of the participants  
 352 generated chunking patterns similar to those seen in young adults on the first day of training. **b)** Average chunking distance  
 353 for each group on each day, with its corresponding standard error. Please note the earlier appearance of "young-like" chunking  
 354 patterns in the older group receiving verum stimulation compared to the placebo group.

355 To test whether these differences in chunking translate into different performances in  
 356 the task for the older group, we identified the participants in the verum group  
 357 classified as young on the first day and plotted their scores separately from the other  
 358 participants in their group, as well as the speed and the accuracy. *Figure 6a* shows  
 359 the scores of all older participants, with "young-like" participants in the verum group  
 360 scoring significantly higher than those in the "old-like" participants in the verum group  
 361 ( $T_{[27]} = 9.36$ ,  $d = 3.27$ ,  $p < 0.0001$ ). Older adults generating young-like patterns on the

362 first day of training were significantly faster on the first training block ( $T_{[12]} = 4.25$ ,  $d =$   
363  $1.41$ ,  $p = 0.02$ ), and overall on the first training day (although this difference was only  
364 a trend, ( $T_{[12]} = 2.77$ ,  $d = 1.71$ ,  $p = 0.07$ )), compared to their peers under the verum  
365 condition, but not chunking like young on the first day of training. From the second  
366 day onwards, young-like older adults were consistently and significantly faster than  
367 their peers. The rate of improvement in speed (i.e., the slope) was significantly  
368 steeper in older adults generating young-like chunking patterns on the first day  
369 compared to those who did not ( $T_{[80]} = 0.54$ ,  $d = 0.29$ ,  $p = 0.005$ ). As for the accuracy,  
370 even after the sub-division based on generated chunking patterns, all older adults  
371 receiving verum stimulation improved theirs sharply on the first training day, while  
372 older adults receiving placebo stimulation did so gradually over training. Older adults  
373 not chunking like young on the first training day (both in the verum and the placebo  
374 groups) required more extensive practice to generate young-like chunking patterns,  
375 an achievement they reached at different time points of training depending on their  
376 speed (please refer to *Figure 6c* and *Figure 6d*), supporting the notion of “a tendency  
377 to chunk facilitating rapid execution, and the need for rapid execution inducing  
378 chunking”<sup>40</sup>.

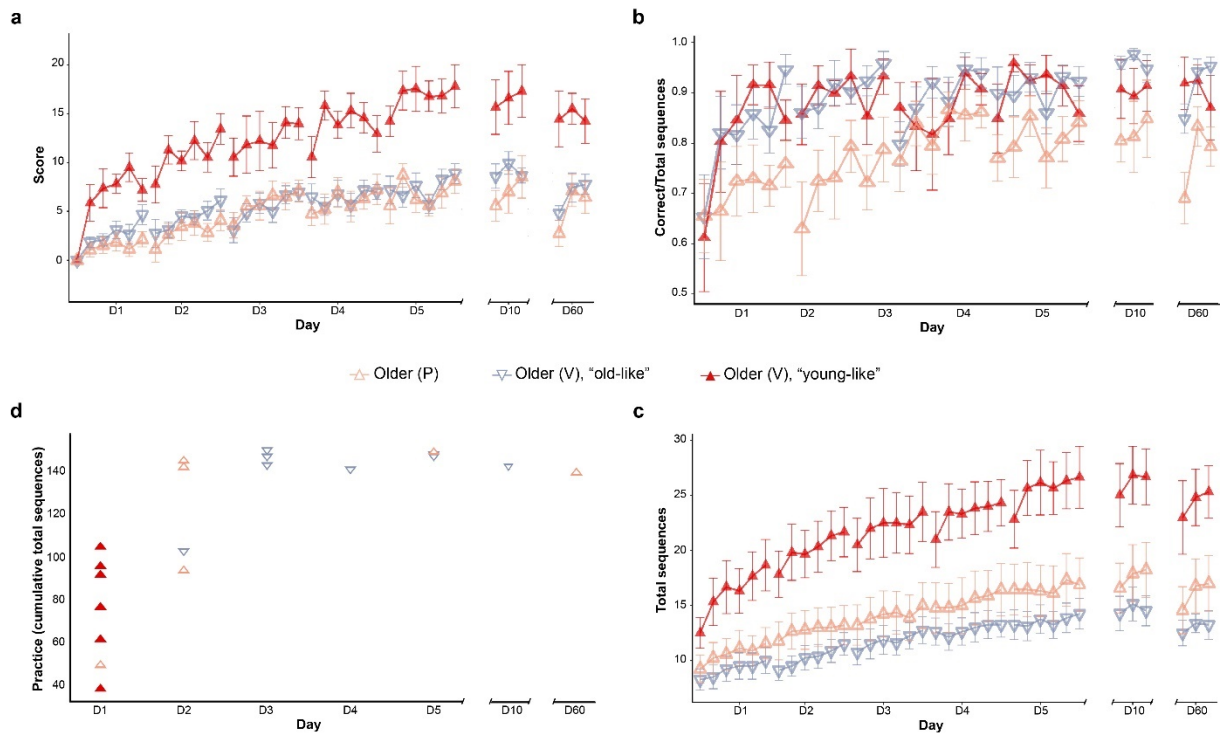

380 **Figure 6. Primary outcome of Experiment 2 for the older groups only, with the group undergoing verum stimulation**  
381 **stratified based on the chunking patterns generated on the first training day. a)** Older participants in the verum (V) group  
382 generating “young-like” patterns on the first day show an enhanced performance compared to those generating “old-like”  
383 patterns in the verum group and those in the placebo (P) group. The error bars depict the standard error for scores averaged  
384 over each training block. Please note the steep increase in the older group who are chunking like the young group, that is, the  
385 increase in performance is reminiscent of the increase seen in participants in the young group. b) Older adults in the (P) and  
386 (V) groups (for the latter, regardless of whether they generated young-like chunking patterns on the first day or not) started  
387 training from comparable levels of accuracy. While the (P) group improved their accuracy gradually over the course of training,  
388 young-like and old-like members of the (V) group improved their accuracy sharply on the first training session, at a rate  
389 comparable to that seen in young adults of the first experiment. c) Older adults in the (V) group generating young-like chunking  
390 patterns on the first day were initially faster than their peers, and increased their speed at a steeper rate. d) This graph depicts  
391 the amount of practice, calculated as sum of total sequences generated, up until each individual generated young-like  
392 chunking patterns, and on which day they did so. Young-like older adults in the verum group required fewer practice than their  
393 peers, most of which required similar amounts of practice (~140 sequences) to generate young-like patterns. Please note that,  
394 when considered alongside the speed of each group (i.e., Figure 6c), this suggests that at lower speeds (i.e., those seen in the  
395 old-like verum and placebo groups), the required amount of practice is higher than it is at higher speeds.

396 **Chunking, stimulation, and neurophysiology.** We used established TMS protocols  
397 to measure intracortical inhibition in all participants in the second experiment. We

398 applied a well-established double pulse TMS paradigm (*i.e.*, short-interval  
399 intracortical inhibition, SICI) <sup>21,41,42</sup> before and after the first training session to  
400 quantify interneuronal GABAergic inhibition within M1, which is directly involved in  
401 the learning and execution of the motor sequence. We applied the SICI paradigm  
402 while participants were at rest. Within the placebo groups, we found no significant  
403 differences in inhibition before or after the first training session or after the whole  
404 training week. Similarly, we did not find significant differences between verum and  
405 placebo in any of the age groups, thus confirming previous reports that SICI does not  
406 significantly change when atDCS is applied together with motor training <sup>43</sup>.

407

## 408 **Discussion**

409 Here, we studied age-related differences in the acquisition of a sequence-tapping  
410 task and applied atDCS concomitant to motor training seeking to enhance  
411 performance. We isolated different components of motor skill acquisition intrinsic to  
412 this task, and followed their evolution throughout and up to 2 months after training.  
413 Applying a black-box testing approach, we contrasted the dynamics of motor skill  
414 acquisition seen in young adults, assumed to be able to acquire the task optimally, to  
415 those seen in older adults, depicting a generally lower performance on this task. Our  
416 results suggest that mastering this motor task relies on the early internalization of the  
417 motor sequence, followed by the practice-dependent optimization of its execution,  
418 observed as motor chunks at a behavioral level.

419

420 The results of the first experiment show that general performance of the sequence-  
421 tapping task decreases with age, with score differences between age groups coming  
422 mostly from the improvement dynamics present in the first training day. Our results  
423 show that speed decreases with age, with relative differences between age groups  
424 as expected from natural muscular deterioration<sup>44</sup> and atrophy in cortical regions and  
425 the corpus callosum<sup>19</sup> that occur during healthy aging. Accuracy, on the other hand,  
426 was initially comparable among the three groups, but improved sharply and reached  
427 a plateau on the first training day in young adults, while older adults improved theirs  
428 gradually over the course of training. These results suggest that young adults  
429 improve their performance of this task first by minimizing the error of execution and  
430 focusing on improving speed thereafter, a behavior reminiscent of the model  
431 proposed by Hikosaka and colleagues<sup>36</sup>.

432

433 Instructing individuals to generate sequential movements in quick succession results  
434 in the spontaneous appearance of temporal patterns known as motor chunks<sup>6,7</sup>. Our  
435 analyses on the chunking patterns produced by all participants showed that older  
436 adults did not generate chunking patterns as young adults did on the first training  
437 day, but did so after more extensive practice. Previous research on motor chunking  
438 assumes chunks emerge from the repeated sequential execution of single  
439 commands in close temporal proximity<sup>9</sup>. In our first experiment, young adults were  
440 faster, so one could deduce that this higher speed allowed for more intensive  
441 practice on the first day of training and that this led them to generate chunking  
442 patterns sooner.

443

444 The second experiment revealed a significant effect of atDCS only in older adults,  
445 with those under the verum condition scoring significantly higher than their peers in  
446 the control group. The same analysis performed on the data from the first experiment  
447 revealed that older adults receiving verum atDCS during training reduced their error  
448 sharply on the first training day, much like young adults of the first experiment did.  
449 Additionally, they generated chunking patterns similar to those seen in young adults  
450 at earlier stages of training, with many of them doing so on the first training day. At a  
451 first glance, these results would suggest not all older adults responded to atDCS to  
452 the same extent. However, the speed and the accuracy of older adults under the  
453 verum condition, grouped according to whether they generated young-like chunking  
454 patterns or not on the first day of training, suggest that atDCS acted on all older  
455 adults by facilitating the encoding and the storage of the sequence in memory,  
456 leading to a sharp improvement in accuracy on the first training session. On the other  
457 hand, older adults with young-like chunking patterns were faster initially, which

458 alongside an optimized accuracy achieved on the first training day, resulted in an  
459 earlier consolidation of motor chunks.

460

461 Therefore, older adults under the verum condition improved their performance  
462 following a similar pattern as the one seen in young adults, optimizing the error first  
463 and improving the execution thereafter, albeit at different rates depending on their  
464 speed of execution. As previously mentioned, speeding up leads to chunk formation,  
465 and chunk formation allows further increases in speed, which is supported by faster,  
466 young-like older adults chunking earlier and increasing their speed more steeply.

467

#### 468 *Motor and cognitive components of the sequence-tapping task*

469 Recent work has suggested that motor chunks are not represented within M1, but  
470 rather form in premotor cortical and striatal centers <sup>45</sup>, with patterns represented in  
471 the parietal cortex, as well as in dorsal and ventral premotor cortices <sup>13</sup>. Subsequent  
472 chunk selection occurs in the striatum <sup>45</sup> and bilateral putamen <sup>46</sup>, as well as dorsal  
473 premotor and supplementary motor areas <sup>47,48</sup>, with chunk execution eventually  
474 occurring in M1 <sup>14</sup>. Krakauer and colleagues <sup>15</sup> suggest that the lack of representation  
475 of motor chunks within M1 indicates these structures are not selectively motor, but  
476 rather cognitive elements independent of motor execution, whose function is limited  
477 to storing the order of the sequential elements for their efficient retrieval. If this were  
478 the case, it would suffice to memorize the sequence for such patterns to emerge and,  
479 in the case of the present study, to optimize its execution and minimize the error. In  
480 the real world, this would translate to a pianist being able to master a musical piece  
481 simply by studying the score, which appears not to be the case <sup>49</sup>.

482



483 Our method captured behavioral differences in speed, accuracy, and generated  
484 chunking patterns. Considering speed increases consistently in all groups without  
485 accuracy ever decreasing, the observed improvement results from a shift in the  
486 speed-accuracy trade-off<sup>4,50</sup>. The increase in accuracy likely reflects the storage of  
487 the sequence elements in memory, resulting from the transition from a state of high  
488 uncertainty (i.e., ignorance of the sequence) to a state of low uncertainty (i.e.,  
489 knowing the sequence). This information constitutes the spatial feature set, specific  
490 to the trained sequence<sup>48</sup>, and likely enables an increase in speed (without  
491 sacrificing the accuracy) by boosting motivation and confidence in the execution itself  
492<sup>51</sup>. This process would indeed be independent of motor practice, and would capture  
493 the cognitive dimension of this task.

494

495 The chunking patterns, as detected by our method, reflect a different set of features.  
496 As the present method uses the inter-key intervals to identify the chunks, it portrays  
497 the rhythm of execution, which constitutes the temporal feature set. Specific temporal  
498 patterns can be encouraged externally (for an example, refer to this experimental  
499 paradigm<sup>52</sup>), much as the partition determines the tempo in music playing. Taught  
500 patterns can be suboptimal, requiring the execution of relatively difficult transitions in  
501 close temporal proximity, but in the absence of external temporal cues, easier  
502 transitions are normally grouped together<sup>53</sup>. These patterns are optimized with  
503 practice, and their structure is constrained by a balance between computational cost  
504 and motor efficiency<sup>38</sup>.

505

506 Kornysheva and Diedrichsen<sup>52</sup> found neural activity encoding spatial and temporal  
507 features independently represented in lateral and bilateral medial premotor cortices.

508 These findings suggest the emergence of motor chunks, as those captured by our  
509 method, result from the storage of both spatial and temporal features in higher brain  
510 areas, upstream from M1 in the motor network, a mechanism that appears to be  
511 diminished in older adults. Our results suggest that the most effective way to improve  
512 performance in this task is to first store the spatial components (i.e., sequence order),  
513 followed by the storage and iterative optimization of the temporal features (i.e.,  
514 chunking patterns). This order may be specific to the present task, in the sense that  
515 no external temporal cues were provided; indeed, it may be that when both the  
516 sequence order and the temporal patterns are explicitly available, both may be  
517 consolidated in parallel.

518

### 519 *Black-box testing*

520 There is an ongoing discussion on whether motor chunks are purely cognitive  
521 elements <sup>15</sup>. In the presently discussed analysis, we consider young adults to be  
522 capable of acquiring motor skills optimally (within the constraints inherent to the  
523 human neuromotor system). As such, we consider them to embody the requirement  
524 of the system for the acquisition of our sequence-tapping task. In young adults, the  
525 accuracy reaches a plateau in the early stages of training, indicating the sequence  
526 has been stored in memory. Chunking patterns, on the other hand, also emerge on  
527 the first training day and remain relatively unchanged for the rest of training. This  
528 early optimization of both the accuracy and the chunking patterns could be  
529 interpreted as chunking patterns being a direct consequence of storing the sequence  
530 in memory. However, the process we observe in older adults suggests otherwise. In  
531 older adults, the mechanism for storing the sequence in memory appears to be  
532 diminished, as their accuracy increases gradually over the course of the training

533 week. Nevertheless, atDCS seems to restore this mechanism early in training, similar  
534 to reactivating a dormant ability of the brain, leading to the early consolidation of  
535 spatial features and resulting in an optimized accuracy on the first training session,  
536 as seen in young adults. Chunking patterns appeared at different stages of training,  
537 which seems to depend on the amount of practice and, indirectly, on the speed of  
538 execution. *Figure 6a* shows faster older adults chunking sooner, which would support  
539 the notion of increased amounts of practice early in training leading to an earlier  
540 consolidation of chunks. This is not supported by the other older adults, as most of  
541 them need similar amounts of practice to generate young-like chunking patterns,  
542 regardless of differences in speed; please note that patterns emerging later in  
543 training, but requiring similar amounts of practice imply a slower execution. It appears  
544 that relatively high speeds (e.g., like those seen in young and middle-aged adults)  
545 place a prime on the optimal execution of the sequence, resulting in an accelerated  
546 formation of chunking patterns, while executing the sequence at lower speeds (e.g.,  
547 old-like older adults under verum and all older adults under the placebo) leads to a  
548 slower consolidation of chunks, requiring more extensive practice.

549

550 These results support the notion of a critically-important cognitive component intrinsic  
551 to sequence-tapping tasks<sup>15</sup>. However, the structure of the patterns detected as  
552 motor chunks at a behavioral level is determined by the ease of the mechanical  
553 transition between key presses<sup>53</sup>, and is optimized with practice (a process occurring  
554 more gradually in slower older adults). This might explain why pianists need  
555 extensive practice to perfect a musical piece, long after memorizing it.

556

557 *The effect of atDCS on the storage of spatial coordinates*

558 Our results suggest atDCS facilitates the consolidation of motor chunks in older  
559 adults when the anode is placed over the contralateral hand-knob representation at  
560 M1 (though it is of note that the spatial resolution of the stimulation is limited) by  
561 facilitating the storage of the sequence order in memory. Given the non-focality  
562 attributed to this technique <sup>54</sup>, we cannot discard the possibility of physiologically  
563 relevant stimulation of other brain areas, like the premotor cortex, as spatial and  
564 temporal components of the sequence are encoded unilaterally and bilaterally,  
565 respectively, in these regions <sup>52</sup>. Therefore, the anode could be inducing LTP-like  
566 plasticity <sup>55</sup> in intracortical interneurons <sup>56</sup> of the M1 contralateral to the trained hand,  
567 but also the ventral and dorsal premotor areas (i.e., PMv and PMd), facilitating the  
568 storage of the spatial coordinates in these regions.

569

570 In search for likely causes behind the selective effect of atDCS, seemingly exclusive  
571 to older adults, we quantified intracortical (GABAergic) inhibition within M1, since  
572 previous studies have shown that less efficient SICI was associated with lower  
573 dexterity in executing rapidly alternating two-finger tapping <sup>20,21</sup>. Nevertheless, we did  
574 not find significant differences between verum and placebo in any of the age groups,  
575 confirming previous reports that SICI does not significantly change when atDCS is  
576 applied together with motor training <sup>43</sup>. This further supports the view that the effect of  
577 atDCS in older adults at a behavioral level does not directly act on the execution of  
578 the sequence itself, but likely on higher brain areas, upstream of the motor network.

579

580 If we conceive the process of chunk formation as the transition from high-uncertainty  
581 to lower-uncertainty in the execution of a motor sequence, we can consider each  
582 source of information to contribute to this change of state. In a recent study, Cross

583 and colleagues found evidence for the primary motor cortex being a hub where both  
584 somatosensory and visual feedback converge<sup>57</sup>. This information is likely integrated  
585 in higher brain areas, such as premotor<sup>58</sup> and parietal cortices<sup>16</sup>, an essential  
586 process to decrease the error in the execution of our task. Sensorimotor integration  
587 decreases with age<sup>59</sup>, so atDCS could be compensating this process in older adults.

588

### 589 *Implications for using atDCS in motor sequence learning*

590 During the first day of training, young adults optimize their accuracy and focus on  
591 improving speed thereafter, experiencing a shift in the speed-accuracy tradeoff early  
592 in training. The consolidation of spatial coordinates allows the rapid optimization of  
593 temporal features, resulting in an early consolidation of chunking patterns. The fact  
594 that these patterns do not change much during the subsequent four days of training  
595 indicates that they reached an optimized strategy. As such, these strategies would  
596 constitute a ceiling on dexterous skill for this task. Our results suggest that atDCS  
597 influences accuracy, but not speed, as we did not find significant differences in speed  
598 related to stimulation in any age group. Nevertheless, it appears that only imbalanced  
599 neural systems that are less than optimal can benefit from stimulation. Neural  
600 responsiveness decreases with healthy aging, which is why enhanced plasticity  
601 induced by atDCS<sup>60</sup> likely benefits older adults<sup>3</sup>. Greeley and colleagues<sup>61</sup> reported  
602 improved motor chunk formation related to atDCS applied to M1 in young adults.  
603 Unfortunately, we cannot compare our results to theirs, as the metric they use is the  
604 number of chunks, which does not provide much information on how the sequences  
605 are segmented. Further, they consider fewer chunks to reflect greater improvement,  
606 which is based on the notion of an eventual full concatenation of chunks, which likely

607 is not attained due to the related computational costs<sup>38</sup>. On the other hand, they did  
608 not find differences in speed nor accuracy, which matches our own findings.

609

## 610 **Limitations**

611 atDCS applied to enhance motor performance has low focality<sup>54</sup>, which limits the  
612 interpretation of how exactly stimulation restores motor and cognitive functions in  
613 older adults in regard to which brain areas of the motor network are mainly involved.  
614 Additionally, the fact that the electrophysiological evaluation (i.e., TMS) could not be  
615 achieved in all subjects limits the null-finding of SICl in relation to learning and atDCS  
616 in this study. In regard to the statistical analysis, we understand there are certain  
617 implications to centering the data, but as we use these comparisons just to lay down  
618 the grounds for the discussion on the actual analysis on the mechanisms behind  
619 apparent differences in motor skill acquisition, we consider the correction and  
620 corresponding statistical tests are justified.

621

## 622 **Conclusions**

623 Sequence learning is essential and ever present in the execution of many activities of  
624 daily life. The black-box approach, contrasting different components of skill  
625 acquisition between young and older adults, whose ability to acquire new skills is  
626 present but diminished, has revealed that mastering motor sequence tasks depends  
627 on the early storage of the sequence elements in memory (i.e., consolidation of  
628 spatial components), leading to the practice-dependent emergence of temporal  
629 patterns (i.e., motor chunks). Non-invasive brain stimulation, as applied here, might  
630 support and accelerate this process in systems not working at the optimal level, such  
631 in healthy older adults.

632

## 633 **Methods**

634 **Participants.** A total of 113 subjects volunteered to participate in our study,  
635 categorized as young (18-30 y/o; n = 41, 27 female; age $\mu$  = 24.5 y/o), middle-aged  
636 (50-65 y/o; n = 34, 20 female; age $\mu$  = 57.7 y/o), and older (>65 y/o; n = 38, 21  
637 female; age $\mu$  = 72.3 y/o) healthy participants. All participants were right handed as  
638 determined by the Edinburgh Handedness Inventory <sup>62</sup>. The participants reported not  
639 having a previous history of serious medical conditions (General Health  
640 Questionnaire, GHQ) or contraindications for tDCS and TMS (questionnaire based  
641 on safety recommendations for these techniques <sup>63</sup>). We performed a neurological  
642 examination on all participants over the age of 50 to ensure that participants were  
643 healthy and performed the Mini-Mental State Exam (MMSE, <sup>64</sup>) to ensure that all  
644 participants scored at least 26 out of 30 points. The participants gave their informed  
645 consent under protocol guidelines approved by the cantonal ethics committee Vaud,  
646 Switzerland (project No. 2017-00301) and the ethics committee Hamburg, Germany  
647 (PV 3770) according to the Declaration of Helsinki.

648 **Motor task.** We used a well-established finger-tapping task <sup>2,3</sup> that required the  
649 participants to replicate a nine-digit numerical sequence displayed on a screen as  
650 quickly and as accurately as possible, using a four-button box with buttons labeled  
651 from “2” to “5” (“2” for the index finger, “5” for the pinky finger). A white dot on the  
652 screen, displayed beneath the numbers, indicated the button to be pressed next. The  
653 dot would move to the next digit as soon as a key was pressed, regardless of  
654 whether or not it was pressed correctly. Before starting the first training session, we  
655 asked all participants to perform a 90-second familiarization block to use as a  
656 reference for general initial skill level (please refer to *Supplementary Materials* for

657 details on how we used this sequence). Training started immediately after this block.  
658 The participants trained their left hand for 20 min each day for five consecutive days.  
659 Each day of training consisted of seven 90-second blocks interspaced by 90-second  
660 rest periods. Six of the blocks from each day contained the same sequence (*i.e.*,  
661 training sequence). The seventh block consisted of a “catch” block presented halfway  
662 through training on each day and contained a sequence different from the training  
663 sequence. Each day of training had a catch block with a different sequence. We used  
664 the catch blocks to test whether the observed improvements were specific to the  
665 training sequence or generalizable to any sequence. We presented the catch blocks  
666 at different stages of the training session on each day, alternating between the third,  
667 fourth and fifth blocks to avoid interfering with overnight consolidation of learning and  
668 anticipation of its appearance <sup>2</sup>. The participants returned for follow-up sessions on  
669 the 10th and 60th days after the beginning of training, during which they executed  
670 three blocks of the training sequence; we used these visits to test for long-term  
671 retention related to the intervention. We did not provide any form of feedback on the  
672 participants’ performance at any time.

673 **Electrophysiological exploration of changes within M1.** We used TMS to identify  
674 the representation of the FDI muscle of the left hand and quantified the interneuronal  
675 GABA<sub>A</sub> receptor-mediated inhibitory networks within the right M1. TMS was delivered  
676 with a 70-mm figure-of-eight coil linked to a Magstim BiStim2/Magstim Bistim  
677 machine (Magstim Ltd., Whitland, UK), and we recorded electromyography (EMG)  
678 signals from the FDI muscle. We first empirically identified the cortical target as the  
679 spot on the scalp eliciting the largest motor evoked potential (MEP) under EMG  
680 control in the left FDI. Then, we identified the resting motor threshold (RMT) as the  
681 minimum single pulse intensity to evoke 50- $\mu$ V MEPs 50% of the time and the single



682 pulse intensity to evoke 1-mV MEPs (test intensity). The SICI was quantified with a  
683 well-established paired-pulse paradigm using a conditioning pulse delivered at 80%  
684 RMT intensity followed 3 ms later by a test pulse delivered at the test intensity  
685 <sup>21,41,42,65–67</sup>. We assessed the RMT, 1-mV test intensity, and SICI before and after the  
686 first training session, after the 5th day of training, and on the 60th day after long-term  
687 retention testing.

688 **Electrical stimulation of M1 during training.** When applying atDCS, the anode was  
689 placed over the FDI hotspot, and the cathode was placed over the left supraorbital  
690 area <sup>3</sup> using squared electrodes (25 cm<sup>2</sup>), covered in sponges soaked in saline  
691 solution (0.9% NaCl), connected to a neuroConn DC-STIMULATOR (Germany  
692 recordings) or a DC-STIMULATOR PLUS (Switzerland recordings) (neuroConn  
693 GmbH, Ilmenau, Germany). Stimulation was applied in a double-blind, placebo-  
694 controlled, parallel design, with all experimenters involved in the acquisition and/or  
695 the analyses of results blinded until the end of the acquisition. The verum stimulation  
696 consisted of 20 min of stimulation with 1 mA direct current (ramp-up/down times of 8  
697 seconds). The placebo stimulation consisted of 40 seconds of stimulation delivered  
698 at the beginning of training (with 8-s ramp-up and 5-s ramp-down times, as defined  
699 by neuroConn) to emulate the prickling sensation on the scalp often reported in the  
700 use of this technique during current intensity variation <sup>68</sup>.

701 **Experimental protocol (Figure 7).** The participants in both Experiment 1 and  
702 Experiment 2 came for seven visits. The participants in Experiment 1 started with  
703 motor training, while the participants in Experiment 2 started the first day with a set of  
704 electrophysiological investigations: identification and neuro-navigated registration of  
705 the FDI hotspot coordinates, identification of the RMT and 1-mV intensity, and a

706 battery of 24 single and 24 double TMS pulses. After these measurements, the  
707 participants executed the motor training described above with concomitant atDCS for  
708 20 min. We repeated the session of electrophysiological investigations after the first  
709 and fifth training sessions and the 60<sup>th</sup> day control session. For each of these  
710 investigations, we adjusted the intensity of the test TMS pulse to maintain a 1-mV  
711 amplitude of the single-pulse MEP.

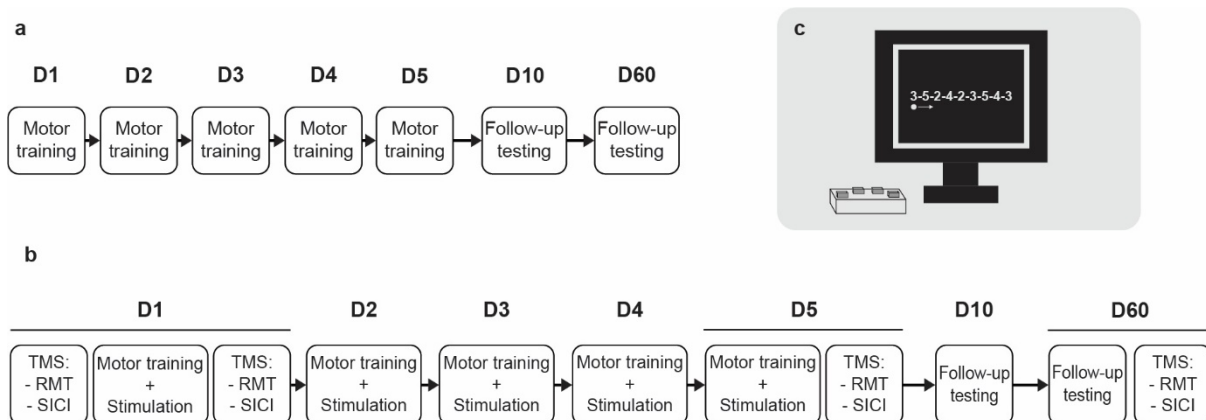

713 **Figure 7. Experimental protocol.** a) Experiment 1 tested the behavioral outcome of five days of training in three groups: young,  
714 middle-aged, and older healthy adults. b) Experiment 2 tested the behavioral and electrophysiological outcomes of five days  
715 of training with atDCS delivered to the motor cortex in six different groups: young, middle-aged, and older healthy adults  
716 receiving either verum or placebo stimulation in a double-blind parallel design. c) The motor training consisted of pressing, as  
717 quickly and accurately as possible, four buttons corresponding to the non-opposable fingers of the left hand (5 = pinky finger)  
718 according to an explicit sequence displayed on a computer screen.

719

720 **Chunking strategy extraction.** We extracted a single chunking pattern to  
721 characterize the execution of the training sequence for each day of every  
722 participant's training. To this end, we applied the clustering approach proposed by  
723 Song and Cohen<sup>69</sup> and labeled successive interkey intervals (IKIs) of every  
724 sequence as either "fast" (*i.e.*, "1") or "slow" (*i.e.*, "0") considering adjacent keys with  
725 intervals labeled "fast" to belong to the same chunk. Please refer to the

726 *Supplementary Materials* for a detailed exposition of our arguments in favor of using  
727 this approach. Each sequence had nine IKIs, with the first reflecting the interval  
728 between the last key press of the previous sequence and the first key press of the  
729 current sequence. After removing incorrect sequences from each block, we  
730 normalized the IKIs in each sequence to the total duration of the sequence (*i.e.*,  
731 divided each IKI by its sequence duration) to account for the gradual increase in  
732 speed during training. After normalization, we applied the K-means clustering  
733 algorithm (Sklearn, <https://scikit-learn.org/>) to sequences of each block, enforcing the  
734 notion of two clusters being present (*i.e.*, “fast” and “slow”) by labeling the IKIs in  
735 each sequence based on their proximity to them. The outcome of this step was a  
736 chunking pattern for each individual sequence. To determine a single pattern  
737 describing strategies for each day, we defined a series of possible criteria:

- 738 1. Maximum allocation: This criterion looks at the most frequently repeated  
739 chunk sizes generated by a participant and excludes patterns with chunk sizes  
740 different from these. It also assumes that participants will allocate all  
741 keystrokes to at least one of the chunks. These two constraints result in the  
742 choice of one dominant pattern for each day.
- 743 2. Reclustering: This criterion sums all chunking patterns for each day and  
744 reclusters them using K-means clustering, outputting a single pattern for the  
745 entire day.
- 746 3. Reclustering top: Similar to the previously mentioned clustering approach, with  
747 the difference that it reclusters only a percentage of the most frequently  
748 repeated patterns. In this case, we fixed this percentage to 15%.

749 4. “More-often-than-not”: This criterion uses all chunking patterns generated on a  
750 day and generates a new sequence containing “1”s for each IKI labeled “1” in  
751 more than 50% of the sequences of that day and zeros otherwise.

752 5. Highest frequency: This criterion takes the most frequently repeated pattern  
753 on each day.

754 For some participants, the pattern found to characterize their execution for a given  
755 day varied depending on the criterion used. For this reason, we used all five criteria  
756 and generated a single chunking pattern by performing a majority vote on the five  
757 patterns. In other words, we obtained five chunking patterns for every participant on  
758 each day. Then, we performed a majority vote for each bit (*i.e.*, each IKI label) of the  
759 five chunking patterns and obtained a single pattern characterizing chunking on that  
760 day. Please refer to the *Supplementary Materials* for more information on this  
761 process.

762 **Chunking pattern classifier.** We fitted a support vector classifier (Sklearn,  
763 <https://scikit-learn.org/>) to chunking patterns generated on the first day by young and  
764 older participants of the first experiment (*i.e.*, training without stimulation). We used  
765 80% of these chunking patterns as the training set and the remaining 20% as the test  
766 set. We did not keep any of these data as the validation set, as we intended to use  
767 the patterns generated by young and older adults receiving placebo stimulation in  
768 Experiment 2 (*i.e.*, training with stimulation) as the validation set. To fine-tune the  
769 model, we performed a grid search cross-validation on different parameters, namely,  
770 the regularization parameter ( $C$ ) and the model kernel, and chose the model yielding  
771 the highest F-scores in both cross-validation and testing. We repeated this process  
772 ten times, varying the samples used as training and testing datasets. After this step,

773 we obtained ten models with parameters optimized to the training set used each  
774 time. Among these ten models, we chose the one with the highest F-scores, with the  
775 optimal parameters being  $C = 0.1$  and a linear kernel, for which the training F-score  
776 was 0.88 and the test score was 1. We chose this model as the final model and used  
777 it to classify chunking patterns generated on the second day onwards in the first  
778 experiment and all days in the second experiment. As previously mentioned, we  
779 validated this model with the chunking patterns generated by the young and the older  
780 groups receiving placebo in Experiment 2, with a classification accuracy of 88.88%  
781 (*i.e.*, F-score of 0.8888).

782 We used the decision boundary from the final model, separating the “young” and  
783 “old” classes, to quantify the resemblance of chunking patterns from every individual  
784 to each class. Specifically, we obtained the distance from each nine-dimensional  
785 data point (corresponding to nine IKIs) to the nine-dimensional hyperplane separating  
786 both classes and used this amount to assess changes in chunking strategy during  
787 training.

788 **Statistical analysis.** We performed all statistical analyses in R <sup>70</sup>. We used the *lme4*  
789 package from Bates and colleagues <sup>71</sup> to fit LME models to our data, and we used  
790 the *emmeans* toolbox <sup>72</sup> for post hoc testing. For the effect sizes, we used the  
791 calculation implemented in *emmeans*, which looks at pairwise differences and divides  
792 them by the standard deviation, and used confidence intervals to account for  
793 uncertainty in estimated effects and estimated standard deviation. We fitted all  
794 models using restricted maximum likelihood (REML). We tested the significance of  
795 fixed effects by means of ANOVA Type III on the model using Satterthwaite's  
796 method, and obtained p-values using the *lmerTest* package <sup>73</sup>. We performed post

797 hoc tests on significant fixed effects and corrected for multiple comparisons using  
798 Tukey's HSD method <sup>74</sup>. We ran two-tailed post hoc tests on the estimated marginal  
799 means (*i.e.*, least-squares means) from our fitted models, with degrees of freedom  
800 estimated using the Kenward-Roger method <sup>75</sup>. The present manuscript discusses,  
801 with a few exceptions, significant results only (with a cutoff for statistical significance  
802 of  $p < 0.05$ ). Please refer to the *Supplementary Materials* for the results for all  
803 statistical tests applied to the data from both experiments.

804

## 805 **Data Availability**

806 The datasets we acquired during both experiments discussed in this study are  
807 available from the corresponding author upon reasonable request.

808

## 809 **Acknowledgment**

810 The project was partially funded by the Defitech Foundation (Morges, CH), the  
811 Federal Ministry of Education and Research (BMBF 01GQ1424B, GER), the Wyss  
812 Foundation (Geneve, CH), the German Research Foundation (SFB 936-C4) and the  
813 Medical Research Fund of the University of Hamburg (GER).

814

## 815 **Author Contributions**

816 Conception (FCH); protocol development (PME, JET, ACS, TM, MJW, FCH); data  
817 acquisition (PME, TP, JET, ACS, MJW); data analyses (PME, TP, ACS, TM, MJW,  
818 FCH); interpretation of results (PME, TP, JWK, MJW, FCH); manuscript (PME, TP,

819 FCH); manuscript critical revision (PME, TP, JET, ACS, JWK, TM, MJW, FCH);  
820 funding (FCH).

821

## 822 **Competing interests**

823 The authors declare no competing interests.

824

## 825 **References**

- 826 1. Doyon, J., Gabbitov, E., Vahdat, S., Lungu, O. & Boutin, A. Current issues related to motor sequence  
827 learning in humans. *Curr. Opin. Behav. Sci.* **20**, 89–97 (2018).
- 828 2. Walker, M. P., Brakefield, T., Hobson, J. A. & Stickgold, R. Dissociable stages of human memory  
829 consolidation and reconsolidation. *Nature* **425**, 616–620 (2003).
- 830 3. Zimmerman, M. *et al.* Neuroenhancement of the aging brain: Restoring skill acquisition in old subjects.  
831 *Ann. Neurol.* **73**, 10–15 (2013).
- 832 4. Reis, J. *et al.* Noninvasive cortical stimulation enhances motor skill acquisition over multiple days  
833 through an effect on consolidation. *Proc. Natl. Acad. Sci.* **106**, 1590–1595 (2009).
- 834 5. Rosenbaum, D. A., Cohen, R. G., Jax, S. A., Weiss, D. J. & van der Wel, R. The problem of serial order in  
835 behavior: Lashley’s legacy. *Hum. Mov. Sci.* **26**, 525–554 (2007).
- 836 6. Sakai, K., Kitaguchi, K. & Hikosaka, O. Chunking during human visuomotor sequence learning. *Exp. Brain*  
837 *Res.* **152**, 229–242 (2003).
- 838 7. Verwey, W. B. Buffer loading and chunking in sequential keypressing. *J. Exp. Psychol. Hum. Percept.*  
839 *Perform.* **22**, 544–562 (1996).
- 840 8. Bo, J. & Seidler, R. D. Visuospatial working memory capacity predicts the organization of acquired  
841 explicit motor sequences. *J. Neurophysiol.* **101**, 3116–3125 (2009).
- 842 9. Abrahamse, E. L., Ruitenberg, M. F. L., de Kleine, E. & Verwey, W. B. Control of automated behavior:  
843 Insights from the discrete sequence production task. *Front. Hum. Neurosci.* **7**, 1–16 (2013).
- 844 10. Wong, A. L. & Krakauer, J. W. Why Are Sequence Representations in Primary Motor Cortex So Elusive?  
845 *Neuron* **103**, 956–958 (2019).

- 846 11. Kawai, R. *et al.* Motor Cortex Is Required for Learning but Not for Executing a Motor Skill. *Neuron* **86**,  
847 800–812 (2015).
- 848 12. Picard, N., Matsuzaka, Y. & Strick, P. L. Extended practice of a motor skill is associated with reduced  
849 metabolic activity in M1. *Nat. Neurosci.* **16**, 1340–1347 (2013).
- 850 13. Yokoi, A. & Diedrichsen, J. Neural Organization of Hierarchical Motor Sequence Representations in the  
851 Human Neocortex. *Neuron* **103**, 1178–1190.e7 (2019).
- 852 14. Yokoi, A., Arbuckle, S. A. & Diedrichsen, J. The Role of Human Primary Motor Cortex in the Production  
853 of Skilled Finger Sequences. *J. Neurosci.* **38**, 1430–1442 (2018).
- 854 15. Krakauer, J. W., Hadjiosif, A. M., Xu, J., Wong, A. L. & Haith, A. M. Motor learning. *Compr. Physiol.* **9**,  
855 613–663 (2019).
- 856 16. Shadmehr, R. & Krakauer, J. W. A computational neuroanatomy for motor control. *Exp. Brain Res.* **185**,  
857 359–381 (2008).
- 858 17. Bishop, N. A., Lu, T. & Yankner, B. A. Neural mechanisms of ageing and cognitive decline. *Nature* **464**,  
859 529–535 (2010).
- 860 18. Frischknecht, R. Effect of training on muscle strength and motor function in the elderly. *Reprod. Nutr.*  
861 *Dev.* **38**, 167–174 (1998).
- 862 19. Seidler, R. D. *et al.* Motor control and aging: Links to age-related brain structural, functional, and  
863 biochemical effects. *Neurosci. Biobehav. Rev.* **34**, 721–733 (2010).
- 864 20. Heise, K. F. *et al.* Differential behavioral and physiological effects of anodal transcranial direct current  
865 stimulation in healthy adults of younger and older age. *Front. Aging Neurosci.* **6**, 1–17 (2014).
- 866 21. Heise, K. *et al.* The Aging Motor System as a Model for Plastic Changes of GABA-Mediated Intracortical  
867 Inhibition and Their Behavioral Relevance. *J. Neurosci.* **33**, 9039–9049 (2013).
- 868 22. Schulz, R. *et al.* White matter integrity of motor connections related to training gains in healthy aging.  
869 *Neurobiol. Aging* **35**, 1404–1411 (2014).
- 870 23. MacDonald, M. E. & Pike, G. B. MRI of healthy brain aging: A review. *NMR Biomed.* **34**, 1–25 (2021).
- 871 24. Tan, J. *et al.* Modulating functional connectivity with non-invasive brain stimulation for the  
872 investigation and alleviation of age-associated declines in response inhibition: A narrative review.  
873 *Neuroimage* **185**, 490–512 (2019).
- 874 25. Shea, C. H., Park, J.-H. & Wilde Braden, H. Age-Related Effects in Sequential Motor Learning. *Phys. Ther.*



- 875            **86**, 478–488 (2006).
- 876    26.    Verwey, W. B. Diminished motor skill development in elderly: Indications for limited motor chunk use.  
877            *Acta Psychol. (Amst)*. **134**, 206–214 (2010).
- 878    27.    Summers, J. J., Kang, N. & Cauraugh, J. H. Does Transcranial Direct Current Stimulation Enhance  
879            Cognitive and Motor Functions in the Ageing Brain? A Systematic Review and Meta-Analysis. *Ageing*  
880            *Res. Rev.* **25**, 42–54 (2016).
- 881    28.    Dayan, E. & Cohen, L. G. Neuroplasticity subserving motor skill learning. *Neuron* **72**, 443–454 (2011).
- 882    29.    Yan, H. J., Abernethy, B. & Li, X. The effects of ageing and cognitive impairment on on-line and off-line  
883            motor learning. *Appl. Cogn. Psychol.* **24**, 200–212 (2010).
- 884    30.    Spencer, R. M. C., Gouw, A. M. & Ivry, R. B. Age-related decline of sleep-dependent consolidation.  
885            *Learn. Mem.* 480–484 (2007). doi:10.1101/lm.569407.until
- 886    31.    Pace-Schott, E. F. & Spencer, R. M. C. Sleep-Dependent Memory Consolidation in Healthy Aging and  
887            Mild Cognitive Impairment. *Curr Top. Behav Neurosci* 289–320 (2014). doi:10.1007/7854
- 888    32.    Doyon, J. *et al.* Contribution of night and day sleep vs. simple passage of time to the consolidation of  
889            motor sequence and visuomotor adaptation learning. *Exp. Brain Res.* **195**, 15–26 (2009).
- 890    33.    Appleman, E. R., Albouy, G., Doyon, J., Cronin-Golomb, A. & King, B. R. Sleep quality influences  
891            subsequent motor skill acquisition. *Behav. Neurosci.* **130**, 290–297 (2016).
- 892    34.    Fogel, S. M. *et al.* fMRI and sleep correlates of the age-related impairment in motor memory  
893            consolidation. *Hum. Brain Mapp.* **35**, 3625–3645 (2014).
- 894    35.    Willingham, D. B. A Neuropsychological Theory of Motor Skill Learning. *Psychol. Rev.* **105**, 558–584  
895            (1998).
- 896    36.    Hikosaka, O. *et al.* Parallel neural networks for learning sequential procedures. *Trends Neurosci.* **22**,  
897            464–471 (1999).
- 898    37.    Rosenbaum, D. A., Kenny, S. B. & Derr, M. A. Hierarchical control of rapid movement sequences. *J. Exp.*  
899            *Psychol. Hum. Percept. Perform.* **9**, 86–102 (1983).
- 900    38.    Ramkumar, P. *et al.* Chunking as the result of an efficiency computation trade-off. *Nat. Commun.* **7**,  
901            (2016).
- 902    39.    Barnhoorn, J. S., Van Asseldonk, E. H. F. & Verwey, W. B. Differences in chunking behavior between  
903            young and older adults diminish with extended practice. *Psychol. Res.* **83**, 275–285 (2019).

- 904 40. Zimnik, A. J. & Churchland, M. M. Independent generation of sequence elements by motor cortex.  
905 *Encycl. Neurol. Sci.* **24**, 421–424 (2021).
- 906 41. Kujirai, T. *et al.* Corticocortical inhibition in human motor cortex. *Biochem. Pharmacol.* **49**, 1185–1193  
907 (1993).
- 908 42. Heise, K. F. *et al.* Altered modulation of intracortical excitability during movement preparation in Gilles  
909 de la Tourette syndrome. *Brain* **133**, 580–590 (2010).
- 910 43. Amadi, U., Allman, C., Johansen-Berg, H. & Stagg, C. J. The homeostatic interaction between anodal  
911 transcranial direct current stimulation and motor learning in humans is related to GABAA activity. *Brain*  
912 *Stimul.* **8**, 898–905 (2015).
- 913 44. Doherty, T. J., Vandervoort, A. A. & Brown, W. F. Effects of ageing on the motor unit: A brief Review.  
914 *Can. J. Appl. Physiol.* **45**, (1993).
- 915 45. Diedrichsen, J. & Kornysheva, K. Motor skill learning between selection and execution. *Trends Cogn. Sci.*  
916 **19**, 227–233 (2015).
- 917 46. Wymbs, N. F., Bassett, D. S., Mucha, P. J., Porter, M. A. & Grafton, S. T. Differential Recruitment of the  
918 Sensorimotor Putamen and Frontoparietal Cortex during Motor Chunking in Humans. *Neuron* **74**, 936–  
919 946 (2012).
- 920 47. Shima, K. & Tanji, J. Both supplementary and presupplementary motor areas are crucial for the  
921 temporal organization of multiple movements. *J. Neurophysiol.* **80**, 3247–3260 (1998).
- 922 48. Nambu, I. *et al.* Decoding sequential finger movements from preparatory activity in higher-order motor  
923 regions: A functional magnetic resonance imaging multi-voxel pattern analysis. *Eur. J. Neurosci.* **42**,  
924 2851–2859 (2015).
- 925 49. Highben, Z. & Palmer, C. Effects of Auditory and Motor Mental Practice in Memorized Piano  
926 Performance. *Bull. Counc. Res. Music Educ.* **159**, (2004).
- 927 50. Hikosaka, O., Yamamoto, S., Yasuda, M. & Kim, H. F. Why skill matters. *Trends Cogn. Sci.* **17**, 434–441  
928 (2013).
- 929 51. Wong, A. L., Lindquist, M. A., Haith, A. M. & Krakauer, J. W. Explicit knowledge enhances motor vigor  
930 and performance: Motivation versus practice in sequence tasks. *J. Neurophysiol.* **114**, 219–232 (2015).
- 931 52. Kornysheva, K. & Diedrichsen, J. Human premotor areas parse sequences into their spatial and  
932 temporal features. *Elife* **3**, e03043 (2014).
- 933 53. Popp, N. J., Yokoi, A., Gribble, P. L. & Diedrichsen, J. The effects of habits on motor skill learning. *bioRxiv*

- 934 (2018). doi:10.1101/338749
- 935 54. Miranda, P. C., Lomarev, M. & Hallett, M. Modeling the current distribution during transcranial direct  
936 current stimulation. *Clin. Neurophysiol.* **117**, 1623–1629 (2006).
- 937 55. Fritsch, B. *et al.* Direct current stimulation promotes BDNF-dependent synaptic plasticity: Potential  
938 implications for motor learning. *Neuron* **66**, 198–204 (2010).
- 939 56. Stagg, C. J. & Nitsche, M. A. Physiological basis of transcranial direct current stimulation. *Neuroscientist*  
940 **17**, 37–53 (2011).
- 941 57. Cross, K. P., Cook, D. J. & Scott, S. H. Convergence of proprioceptive and visual feedback on neurons in  
942 primary motor cortex. *bioRxiv* (2021). doi: <https://doi.org/10.1101/2021.05.01.442274>
- 943 58. Takei, T., Lomber, S. G., Cook, D. J. & Scott, S. H. Transient deactivation of dorsal premotor cortex or  
944 parietal area 5 impairs feedback control of the limb in macaques. *Curr. Biol.* **31**, 1476–1487.e5 (2021).
- 945 59. Degardin, A. *et al.* Deficit of sensorimotor integration in normal aging. *Neurosci. Lett.* **498**, 208–212  
946 (2011).
- 947 60. Monte-Silva, K. *et al.* Induction of late LTP-like plasticity in the human motor cortex by repeated non-  
948 invasive brain stimulation. *Brain Stimul.* **6**, 424–432 (2013).
- 949 61. Greeley, B., Barnhoorn, J. S., Verwey, W. B. & Seidler, R. D. Multi-session Transcranial Direct Current  
950 Stimulation Over Primary Motor Cortex Facilitates Sequence Learning, Chunking, and One Year  
951 Retention. *Front. Hum. Neurosci.* **14**, 1–18 (2020).
- 952 62. Oldfield, R. C. The assessment and analysis of handedness: The Edinburgh Inventory. *Neuropsychologia*  
953 **9**, 97–113 (1971). doi:10.1007/978-0-387-79948-3\_6053
- 954 63. Rossi, S. *et al.* Safety, ethical considerations, and application guidelines for the use of transcranial  
955 magnetic stimulation in clinical practice and research. *Clin. Neurophysiol.* **120**, 2008–2039 (2009).
- 956 64. Folstein, M. F., Robins, L. N. & Helzer, J. E. The mini-mental state examination. *Arch. Gen. Psychiatry* **40**,  
957 812 (1983).
- 958 65. Siebner, H. R. & Rothwell, J. Transcranial magnetic stimulation: New insights into representational  
959 cortical plasticity. *Exp. Brain Res.* **148**, 1–16 (2003).
- 960 66. Hummel, F. C. *et al.* Deficient intracortical inhibition (SICI): During movement preparation after chronic  
961 stroke. *Neurology* **72**, 1766–1772 (2009).
- 962 67. Liuzzi, G. *et al.* Development of intracortical inhibition during movement preparation in acute to

- 963 chronic subcortical stroke. *Neurology* **82**, 198–205 (2014).
- 964 68. Gandiga, P. C., Hummel, F. C. & Cohen, L. G. Transcranial DC stimulation (tDCS): A tool for double-blind  
965 sham-controlled clinical studies in brain stimulation. *Clin. Neurophysiol.* **117**, 845–850 (2006).
- 966 69. Song, S. & Cohen, L. Impact of conscious intent on chunking during motor learning. *Learn. Mem.* **21**,  
967 449–451 (2014).
- 968 70. RCoreTeam. R: A language and environment for statistical computing. (2019).
- 969 71. Bates, D., Mächler, M., Bolker, B. M. & Walker, S. C. Fitting linear mixed-effects models using lme4. *J.*  
970 *Stat. Softw.* **67**, (2015).
- 971 72. Lenth, R. emmeans: Estimated Marginal Means, aka Least-Squares Means. (2020).
- 972 73. Kuznetsova, A., Brockhoff, P. B. & Christensen, R. H. B. lmerTest Package: Tests in Linear Mixed Effects  
973 Models. *J. Stat. Softw.* **82**, 1–26 (2017).
- 974 74. Tukey, J. W. Comparing Individual Means in the Analysis of Variance. *Int. Biometric Soc.* **5**, 99–114  
975 (1949).
- 976 75. Kenward, M. G. *et al.* Small Sample Inference for Fixed Effects from Restricted Maximum Likelihood  
977 Published by : International Biometric Society Stable URL : <http://www.jstor.org/stable/2533558>  
978 REFERENCES Linked references are available on JSTOR for this article : You may need. **53**, 983–997  
979 (2016).
- 980
